# Supplementary material
Source: PubMed Central journal article supplement (PMC9637749)
Supplement: mmc1.pdf [file mmc1.pdf]

## **Supplemental Information**

### **CircRNA Samd4 induces cardiac repair after myocardial infarction by blocking mitochondria-derived ROS output**

**Hao Zheng, Senlin Huang, Guoquan Wei, Yili Sun, Chuling Li, Xiaoyun Si, Yijin Chen, Zhenquan Tang, Xinzhong Li, Yanmei Chen, Wangjun Liao, Yulin Liao, and Jianping Bin**

# 1 Supplemental figures and legends

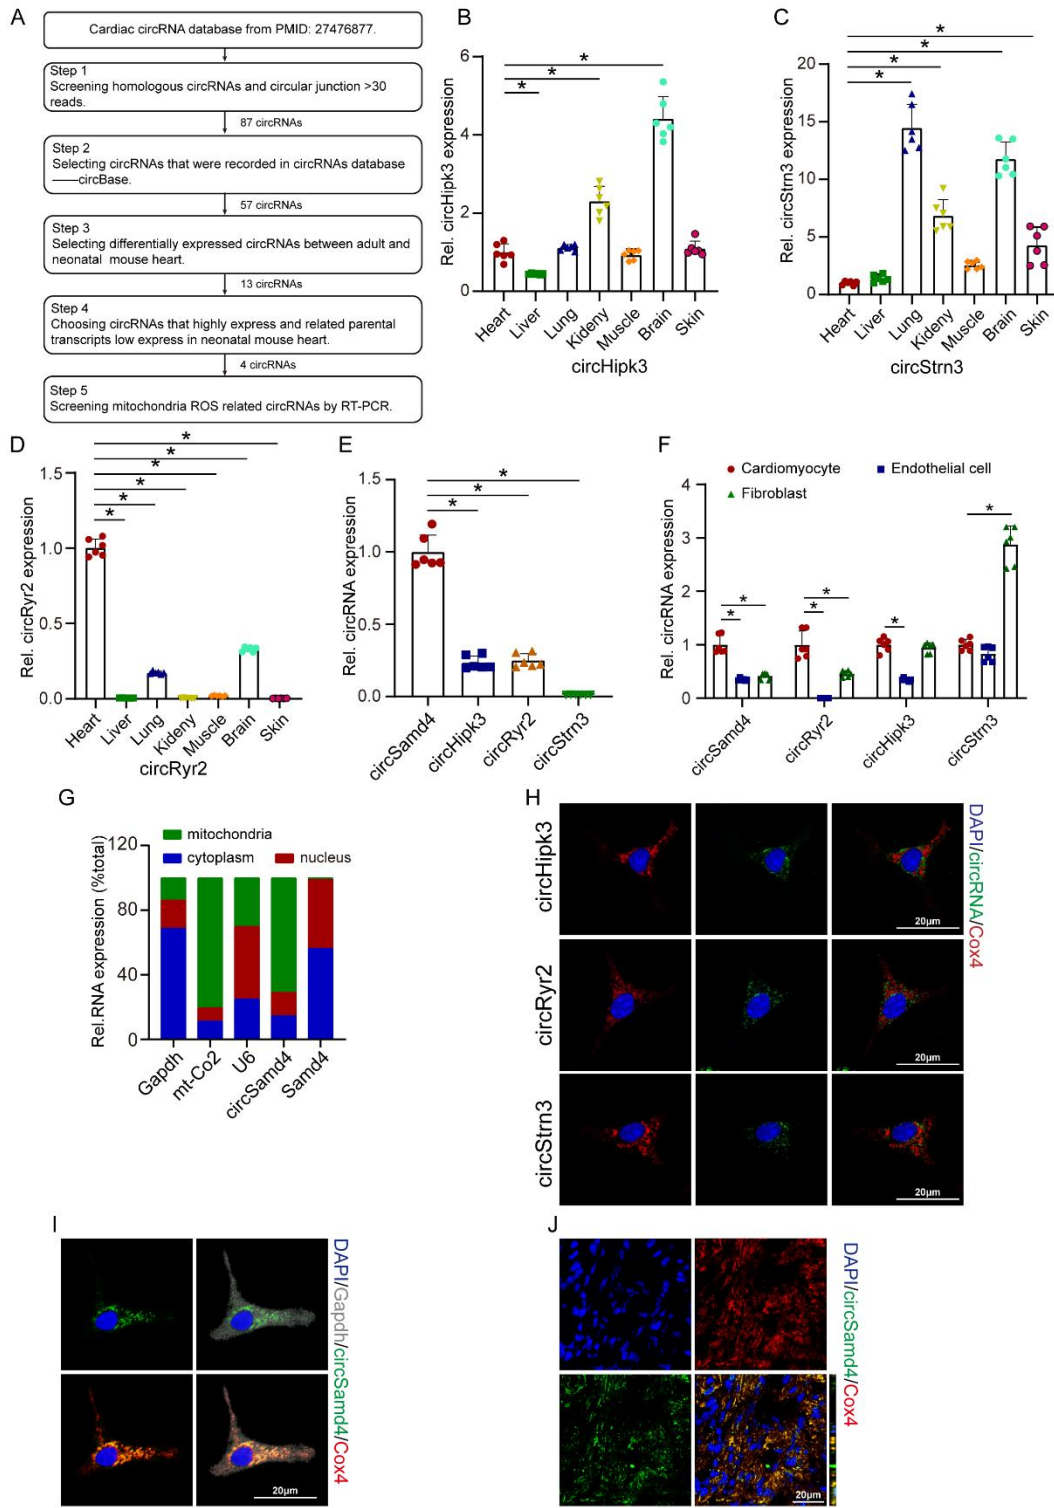

2

3 **Figure S1. Identification of neonatal CM-enriched circRNAs that are involved in**

4 **antioxidative response.** (A) Illustration of steps for identifying and validating

5 neonatal CM-enriched circRNAs that are involved in antioxidative response. (B-D)

1 The relative expression levels of indicated circRNAs in multiple types of tissues in  
2 neonatal mouse; \* $P < 0.05$  vs. heart in each group, n=6; (E) The relative expression  
3 levels of indicated circRNAs in myocardium of neonatal mouse; \* $P < 0.05$  vs.  
4 circSamd4, n=6; (F) The relative expression levels of indicated circRNAs in P1 CM,  
5 cardiac endothelial cell and cardiac fibroblast; \* $P < 0.05$  vs. CM in each group, n=6;  
6 (G) CircSamd4 were detected in nuclei, cytoplasm and mitochondria extract of CM.  
7 U6, Gapdh and mt-Co2 was used as the nuclei, cytoplasm and mitochondria marker,  
8 respectively. (H) RNA-FISH assay of circHipk3, circRyr2 and circStrn3,  
9 coimmunostaining of Cox4 in P1 CMs. (I) RNA-FISH assay of circSamd4,  
10 coimmunostaining of Cox4 and Gapdh in P1 CMs. (J) RNA-FISH assay of circSamd4,  
11 coimmunostaining of Cox4 in P1 heart tissue.

12

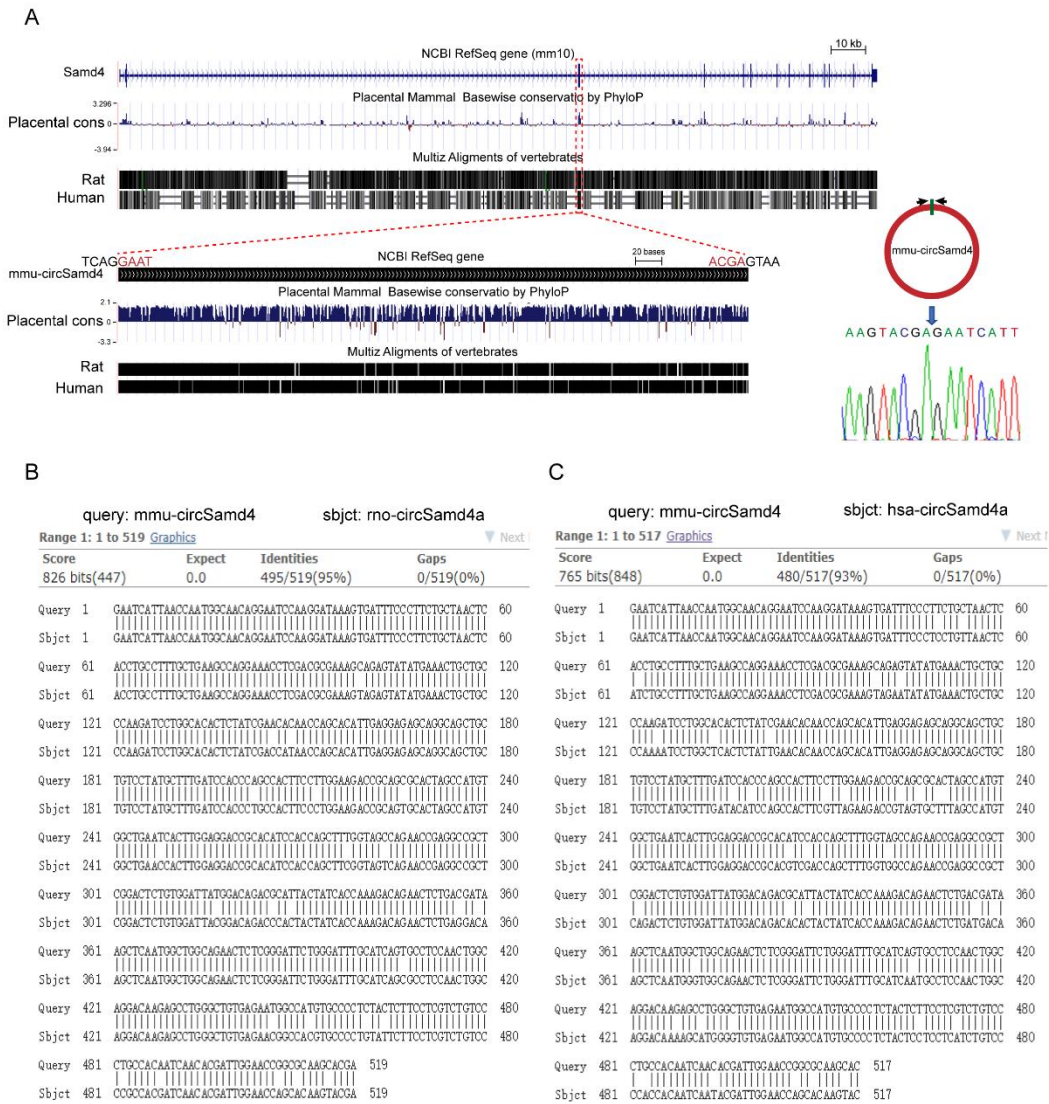

1

2 **Figure S2. Conservation analysis of circSamd4 sequence.** (A) Species conservation

3 analysis showed that the sequence of circSamd4a were conserved across humans, mice

4 and rats; the result of Sanger sequencing present in the lower right-hand corner

5 revealed the head-to-tail junction of circSamd4. (B-C) circSamd4 conservation

6 analysis in human, mouse and rat genome was conducted by using Basic Local

7 Alignment Search Tool (BLAST).

8

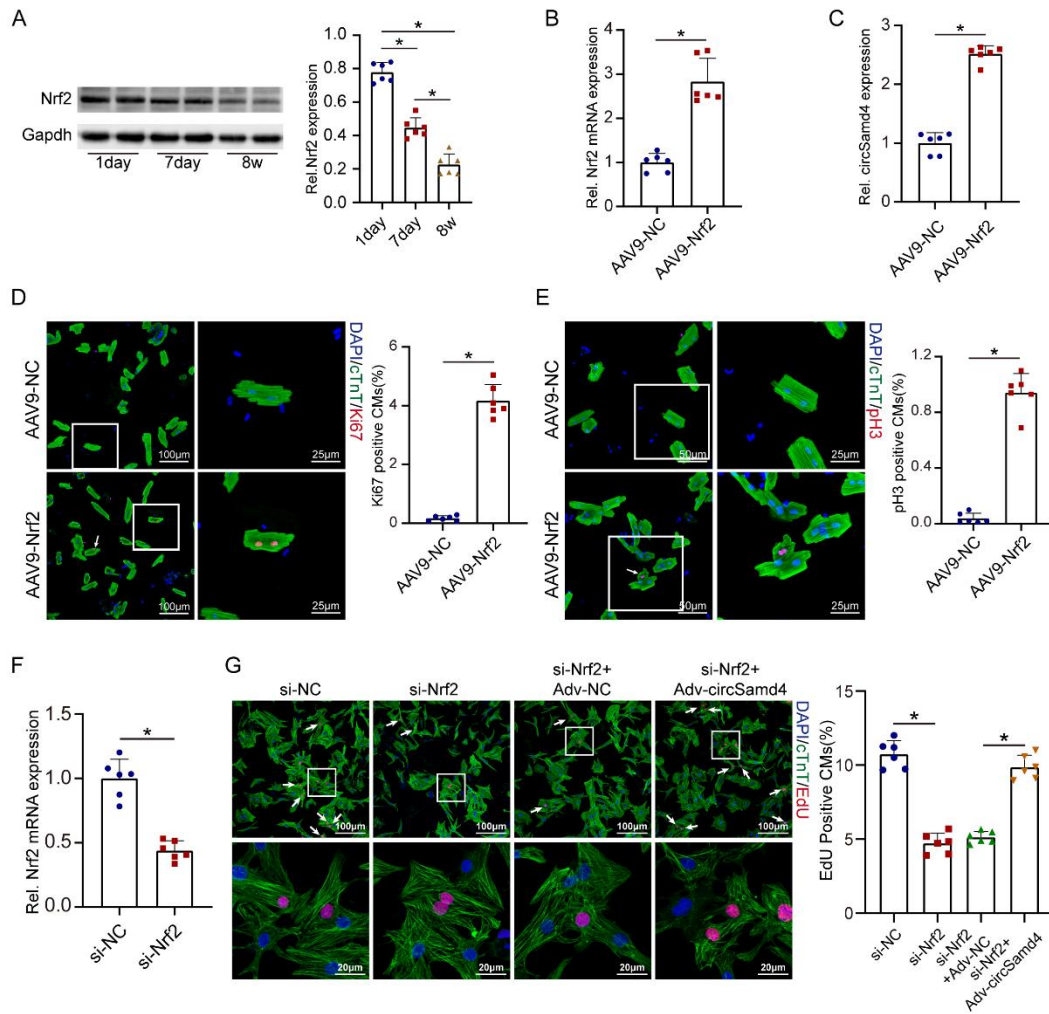

1

2 **Figure S3. The role of Nrf2 on CM proliferation and cardiac regeneration. (A)**

3 Detection of Nrf2 protein expression level in CMs of different developmental stages.

4 \* $P < 0.05$ ,  $n = 6$ . (B-C) Detection of Nrf2 and circSamd4 expression level in adult

5 mouse hearts after injection of AAV9-Nrf2 or AAV9-NC. \* $P < 0.05$ ,  $n = 6$ . (D)

6 Detection of Ki67+ adult CMs isolated from adult mouse heart after AAV9-Nrf2 and

7 AAV9-NC injection. Ki67+ CMs are indicated by arrows, \* $P < 0.05$ ,  $n = 6$ . (E)

8 Detection of pH3+ adult CMs isolated from adult mouse heart after AAV9-Nrf2 and

9 AAV9-NC injection. PH3+ CMs are indicated by arrows, \* $P < 0.05$ ,  $n = 6$ . (F) The

10 transfection of Nrf2 siRNA decreased Nrf2 expression in P1 CMs. The Nrf2 mRNA

1 abundance was detected by qRT-PCR assay. \* $P$ <0.05,  $n$ =6; (G) Representative images  
 2 and quantification of EdU+ CMs in P1 CMs after Nrf2 and circSamd4 interference.  
 3 EdU+ CMs are indicated by arrows, \* $P$ <0.05,  $n$ =6.

4

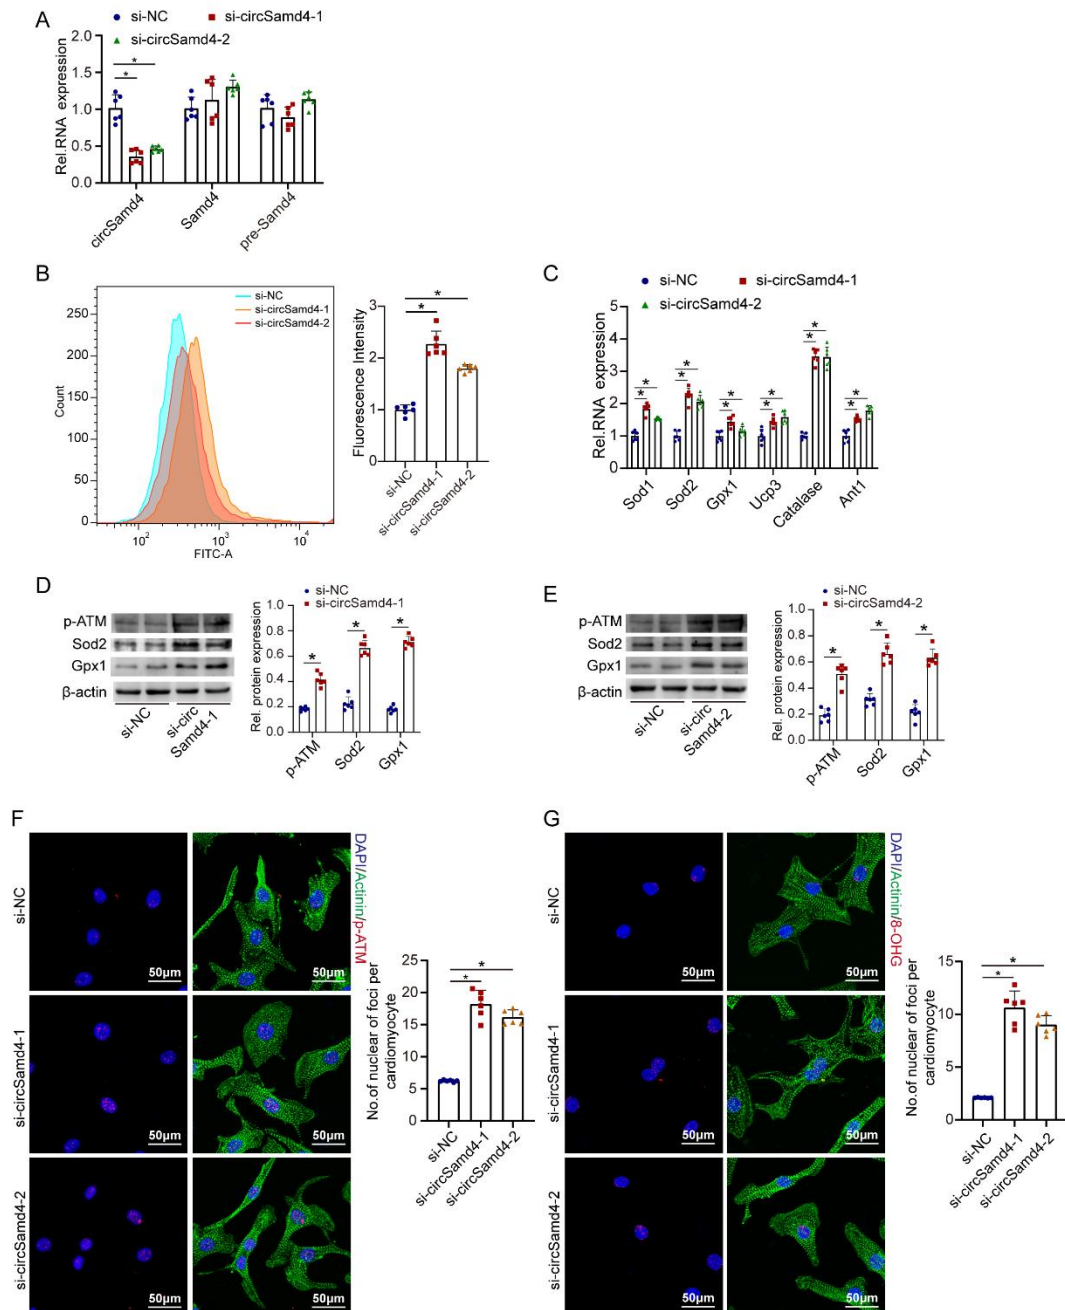

5

6 **Figure S4. CircSamd4 down-regulation increased intracellular oxidative stress in**

7 **CMs. (A) Changes in the expression level of circSamd4 after siRNA transfection.**

1 \* $P$ <0.05 vs. si-NC, n=6. (B) Quantified cellular oxidative stress by DCFH-DA assay  
 2 using flow cytometry. \* $P$ <0.05 vs. si-NC, n=6. (C) Detection of the expression levels  
 3 of genes related to oxidative stress in P1 CMs after circSamd4 knockdown or control  
 4 treatment using qRT-PCR assays. \* $P$ <0.05 vs. si-NC, n=6. (D-E) Changes in the  
 5 expression level of the Sod, Gpx1 and p-ATM protein after circSamd4 knockdown.  
 6 \* $P$ <0.05, n=6. (F) Detection of p-ATM expression in CMs after circSamd4  
 7 down-regulation via Immunofluorescence assays. \* $P$ <0.05 vs. si-NC, n=6. (G)  
 8 Detection of 8-OHG expression in CMs after circSamd4 down-regulation via  
 9 Immunofluorescence assays. \* $P$ <0.05 vs. si-NC, n=6.

10

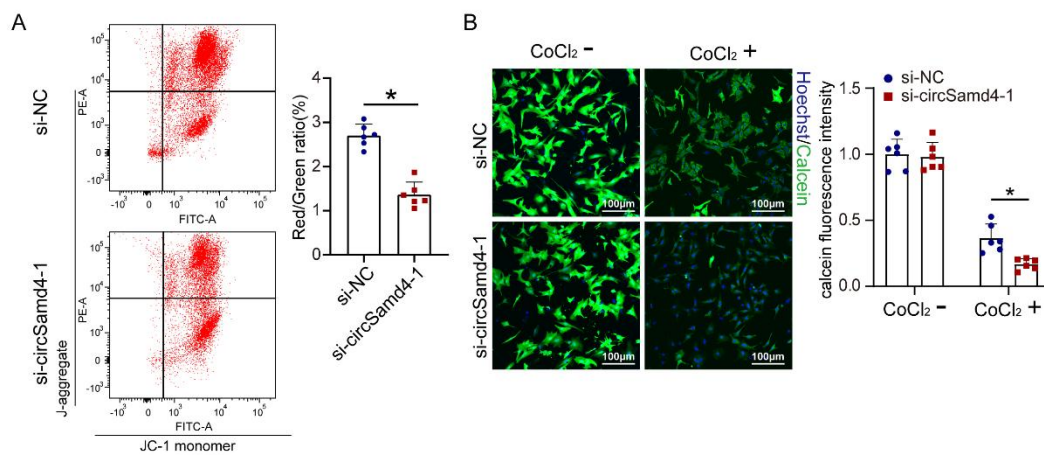

11

12 **Figure S5. CircSamd4 knockdown promoted MMP opening in CMs *ex vivo*.** (A)

13 Detection of the MMP of P1 CMs after circSamd4 interference using flow cytometry

14 assay. \* $P$ <0.05, n=6. (B) Detection of the MMP opening status after circSamd4

15 interference by Calcein-AM/CoCl<sub>2</sub> method. \* $P$ <0.05, n=6.

16

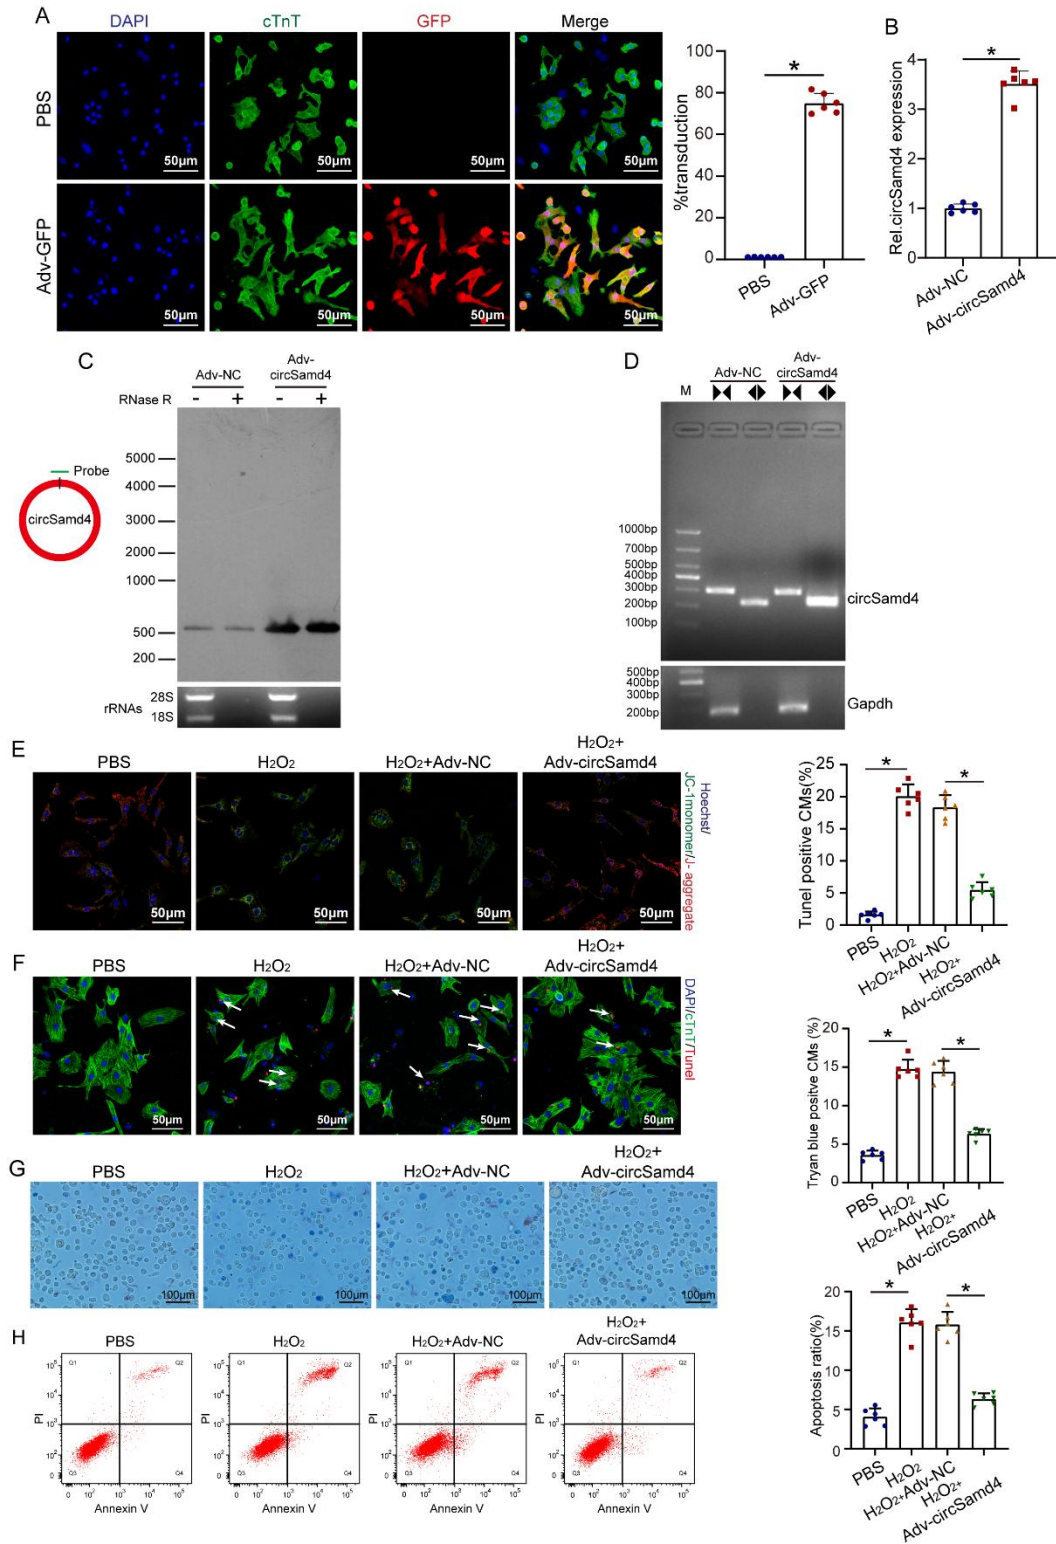

1

2 **Figure S6. Evaluation of anti-oxidation effect of Adv-circSamd4.** (A) GFP/cTnT

3 co-staining in P1 CMs after transduction of Adv-GPF. (B) The transduction of

4 Adv-circSamd4 increased circSamd4 expression in P1 CMs; \* $P < 0.05$ ,  $n = 6$ ; (C)



1 Detection of circSamd4 in CMs after Adv-circSamd4 or Adv-NC transfection via  
2 Northern blot analysis. The used probe was targeting circSamd4 back-splicing site. (D)  
3 Amplification of circSamd4 in cDNA but not genomic DNA using divergent primers;  
4 gDNA, genomic DNA. (E) Assessing the MMP of P1 CMs using  
5 immunofluorescence assay. P1 CMs were transduced with Adv for 24 h, and then  
6 incubated with H<sub>2</sub>O<sub>2</sub> (20 μM) for 8 hours. JC-1 monomer: green; J-aggregate: red. (F)  
7 Assessing the ratio of apoptotic CMs using TUNEL staining. P1 CMs were  
8 transduced with Adv for 24 h, and then incubated with H<sub>2</sub>O<sub>2</sub> (20 μM) for 8 hours.  
9 TUNEL+ CMs are indicated by arrows, \**P*<0.05, n=6. (G) Assessing the ratio of  
10 death CMs using Trypan Blue Exclusion. P1 CMs were transduced with Adv for 24 h,  
11 and then incubated with H<sub>2</sub>O<sub>2</sub> (20 μM) for 8 hours. Blue stained, dead CMs. \**P*<0.05,  
12 n=6. (H) Assessing the ratio of apoptotic CMs using Annexin V-FITC/PI fluorescent  
13 staining. P1 CMs were transduced with Adv for 24 h, and then incubated with H<sub>2</sub>O<sub>2</sub>  
14 (20 μM) for 8 hours. \**P*<0.05, n=6.

15

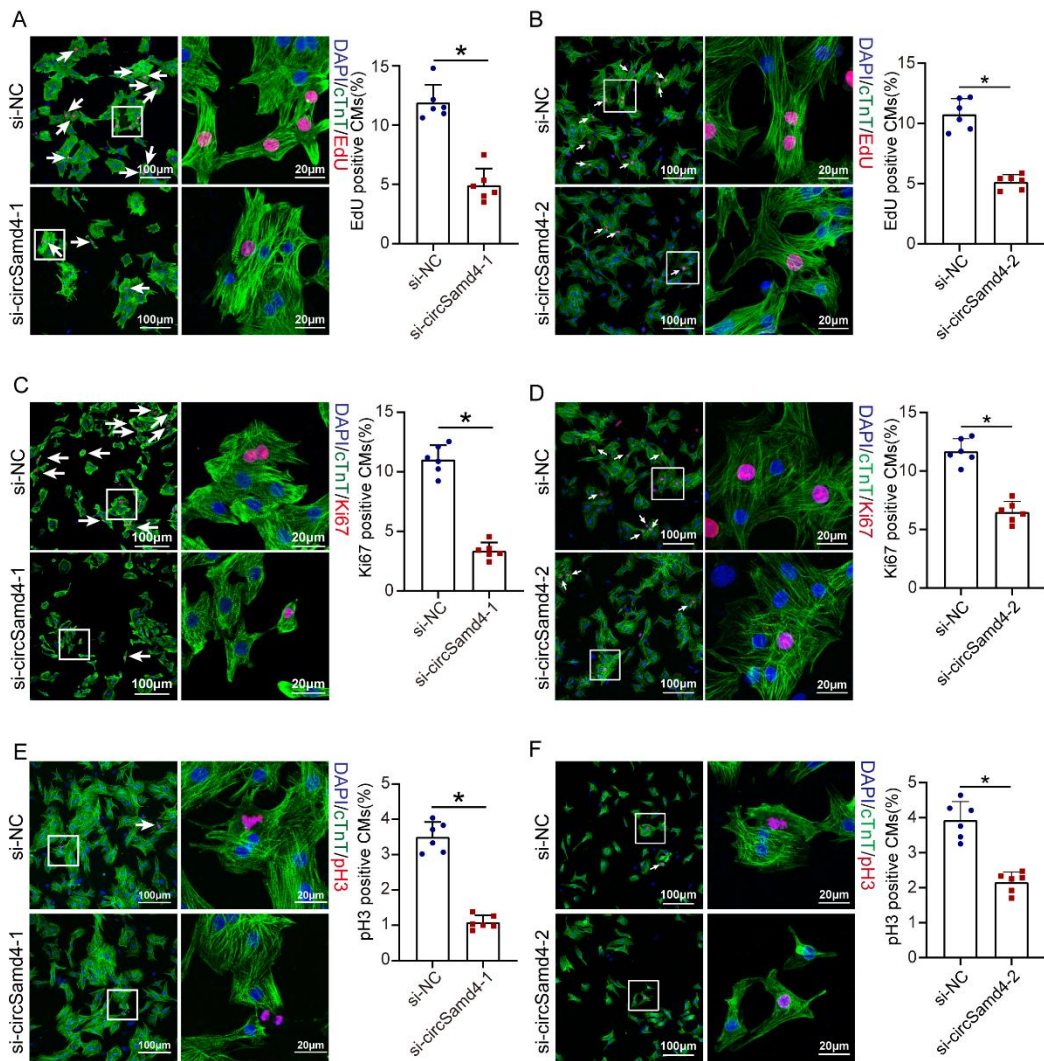

1

2 **Figure S7. CircSamd4 knockdown repressed neonatal CM proliferative. (A-B)**

3 Representative images and quantification of EdU+ CMs in P1 CMs after circSamd4

4 interference. EdU+ CMs are indicated by arrows, \* $P < 0.05$  vs. si-NC,  $n = 6$ . (C-D)

5 Representative images and quantification of Ki67+ CMs in P1 CMs after circSamd4

6 interference. Ki67+ CMs are indicated by arrows, \* $P < 0.05$  vs. si-NC,  $n = 6$ . (E-F)

7 Representative images and quantification of pH3+ CMs in P1 CMs after circSamd4

8 interference. pH3+ CMs are indicated by arrows, \* $P < 0.05$  vs. si-NC,  $n = 6$ .

9

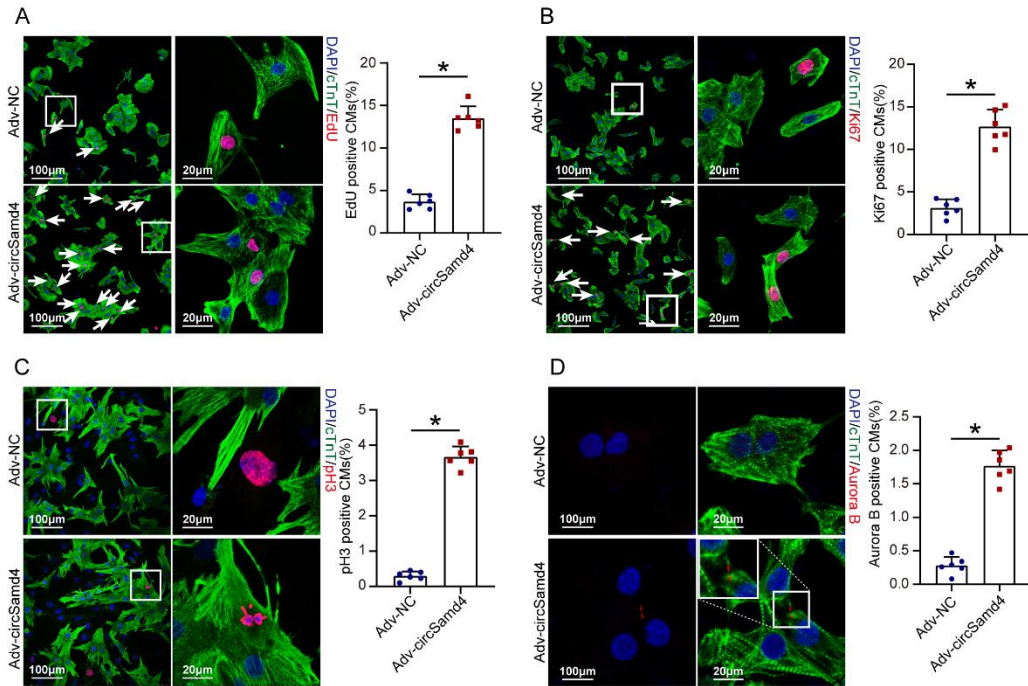

1

2 **Figure S8. CircSamd4 overexpression promoted P7 CM proliferation *in vitro*.** (A)

3 Representative images and quantification of EdU+ CMs after circSamd4

4 overexpression; \* $P < 0.05$ ,  $n = 6$ . (B) Representative images and quantification of Ki67+

5 CMs after circSamd4 overexpression; \* $P < 0.05$ ,  $n = 6$ . (C) Representative images and

6 quantification of pH3+ CMs after circSamd4 overexpression; \* $P < 0.05$ ,  $n = 6$ . (D)

7 Representative images and quantification of Aurora B+ CMs after circSamd4

8 overexpression; \* $P < 0.05$ ,  $n = 6$ .

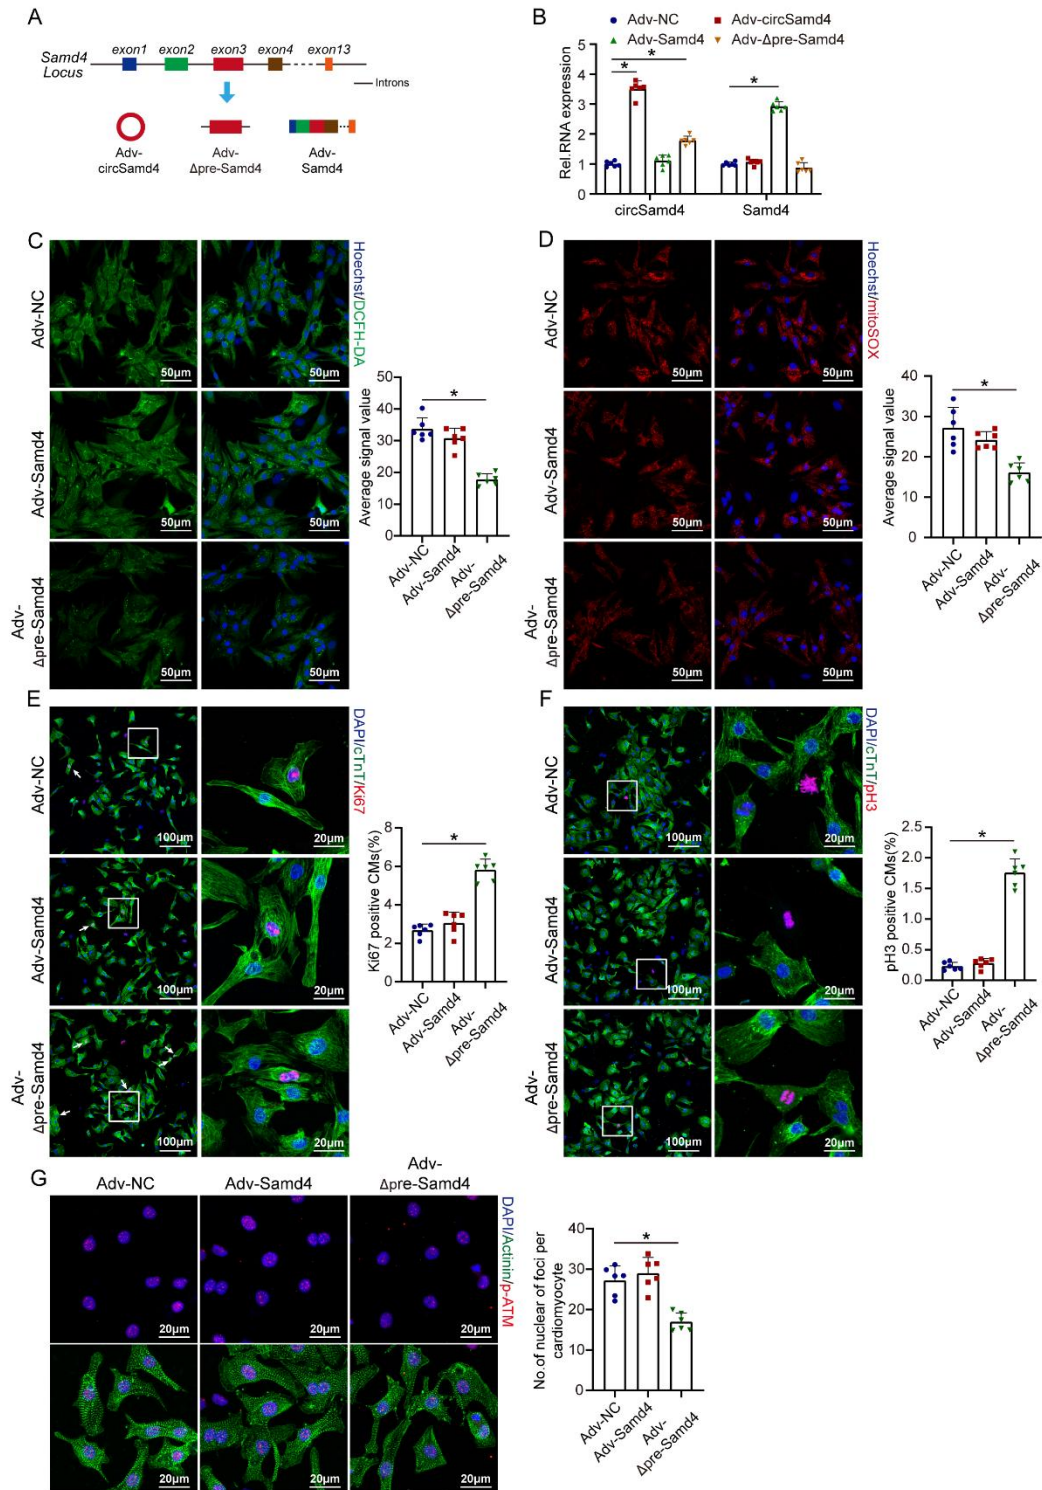

1

2 **Figure S9. The effect of Samd4 mRNA or Samd4 pre-mRNA overexpression on**  
 3 **CM proliferation.** (A) The schematics showed that sequence of Adv vector encoding  
 4 for circSamd4, Samd4 mRNA and Samd4 pre-mRNA fragment. Δpre-Samd4: Samd4  
 5 pre-mRNA fragment containing exon3 and its flanking sequences (2.5kb). (B)

1 Detection of circSamd4 and Samd4 mRNA expression level after different Adv vector  
2 transfection in P1 CMs; \* $P < 0.05$ , n=6. (C-D) Detection of cytosolic (C) and  
3 mitochondrial (D) ROS in CMs by confocal microscopy; \* $P < 0.05$ , n=6. (E)  
4 Evaluation of CM proliferative activity by Ki67 immunostaining after Adv vector  
5 transfection. Ki67+ CMs are indicated by arrows, \* $P < 0.05$ , n=6. (F) Evaluation of  
6 CM proliferative activity by pH3 immunostaining after Adv vector transfection. pH3+  
7 CMs are indicated by arrows, \* $P < 0.05$ , n=6. (G) Transfection of vector for Samd4  
8 pre-mRNA fragment reduced DNA damage induced by H<sub>2</sub>O<sub>2</sub>. CMs were transduced  
9 with Adv for 24 h and then incubated with H<sub>2</sub>O<sub>2</sub> (20 μM) for 8 hours. \* $P < 0.05$ , n=6.

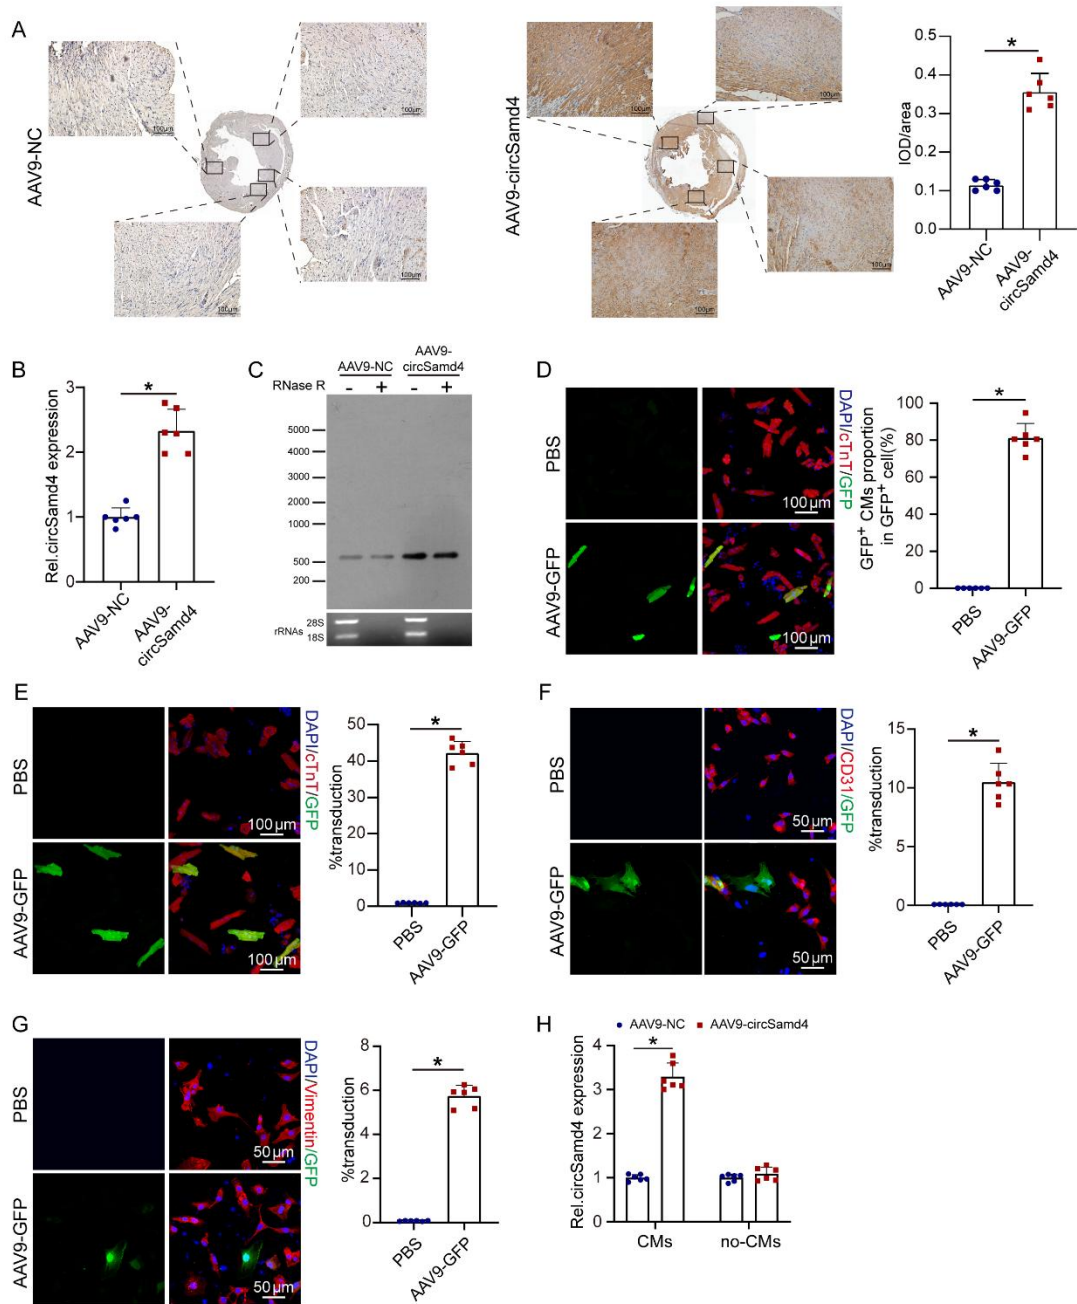

1

2 **Figure S10. Evaluation of transduction efficiency and specificity for**

3 **AAV9-circSamd4.** (A-B) The expression of circSamd4 was increased in adult mouse

4 hearts 14 days after injection of AAV9-circSamd4, compared to AAV9-NC. \* $P < 0.05$ .

5 (A): ISH assays of circSamd4 in heart sections was conducted on 4 sections per

6 sample and images from 4 different randomly selected area were acquired,  $n = 6$ . (B):

7 PCR assays,  $n = 6$ . (C) Detection of circSamd4 in myocardium tissue after

1 AAV9-circSamd4 or AAV9-NC infection via Northern blot analysis. The used probe  
2 was targeting circSamd4 back-splicing site. (D) Representative images and  
3 quantification of GFP+ CMs in total GFP+ cells isolated from adult mouse hearts on  
4 14 days after injection of AAV9-GFP or PBS,  $*P<0.05$ , n=6. (E) The transduction  
5 efficiency in CMs isolated from adult mouse hearts on 14 days after injection of  
6 AAV9-GFP or PBS,  $*P<0.05$ , n=6. (F) The transduction efficiency in endothelial cells  
7 isolated from adult mouse hearts on 14 days after injection of AAV9-GFP or PBS,  
8  $*P<0.05$ , n=6. (G) The transduction efficiency in cardiac fibroblasts isolated from  
9 adult mouse hearts on 14 days after injection of AAV9-GFP or PBS,  $*P<0.05$ , n=6. (H)  
10 Detection of circSamd4 expression in adult CMs and non-CMs after  
11 AAV9-circSamd4 or AAV9-NC injection.  $*P<0.05$ , n=6.

12

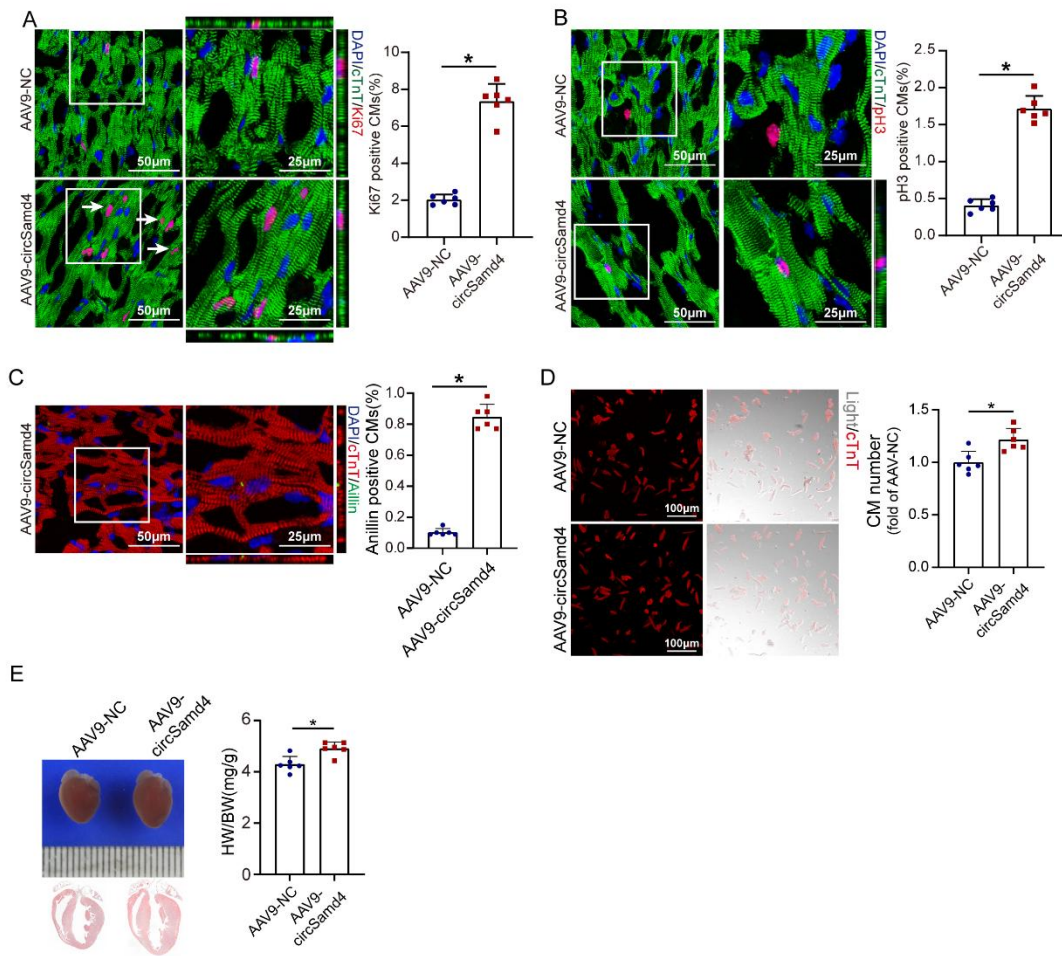

1

2 **Figure S11. CircSamd4 overexpression promoted CM proliferation in adult**

3 **mouse hearts *in vivo*.** (A) Evaluation of adult CMs proliferation by Ki67

4 immunostaining 14 days after AAV9-circSamd4 or AAV9-NC injection; \* $P < 0.05$ ,  $n = 6$ .

5 (B) Evaluation of adult CMs proliferation by pH3 immunostaining 14 days after

6 AAV9-circSamd4 or AAV9-NC injection; \* $P < 0.05$ ,  $n = 6$ . (C) Evaluation of adult CMs

7 proliferation by Anillin immunostaining 14 days after AAV9-circSamd4 or AAV9-NC

8 injection; \* $P < 0.05$ ,  $n = 6$ . (D) Comparison of CMs number in adult hearts from

9 AAV9-circSamd4 and AAV9-NC group. Scale bars, 100  $\mu\text{m}$ . \* $P < 0.05$ ,  $n = 6$ . (E)

10 Comparison of adult heart weight/body weight ratios between AAV9-circSamd4 and

11 AAV9-NC group. \* $P < 0.05$ ,  $n = 6$ .



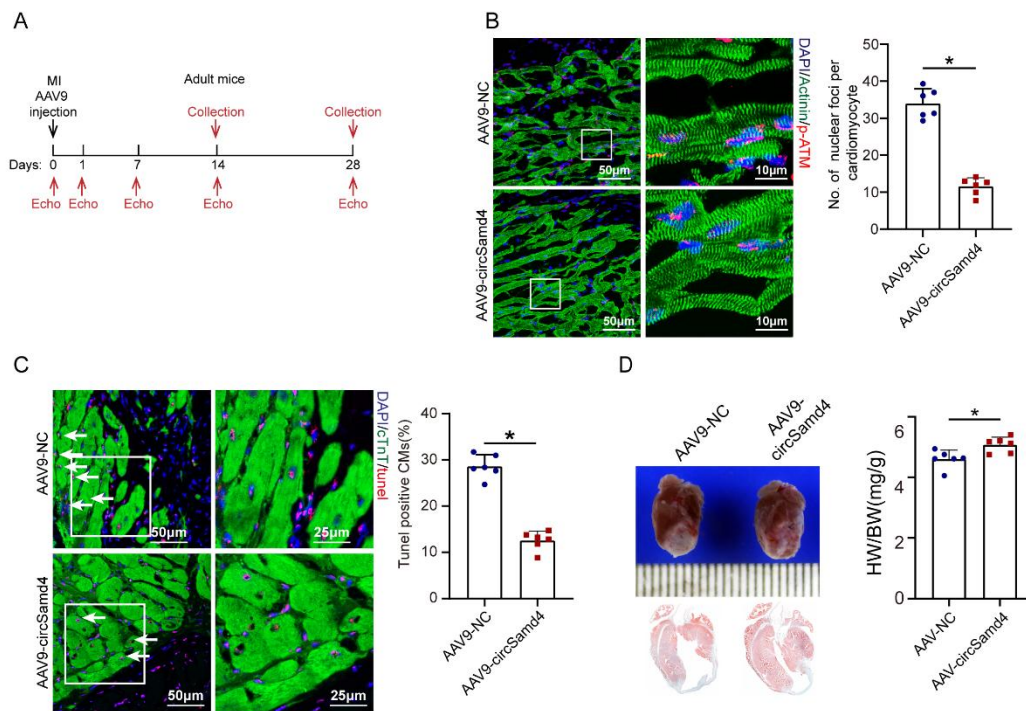

1

2 **Figure S12. CircSamd4 overexpression alleviated oxidative injury in adult mouse**

3 **hearts after MI.** (A) Schematic of the myocardial infarction (MI) experiments in

4 adult mice. Echo, echocardiography. (B) Detection of DDR in adult CMs 14 days

5 post-MI. \* $P < 0.05$ ,  $n = 6$ . (C) Detection of apoptotic CMs 14 days post-MI using

6 TUNEL staining. TUNEL+ CMs are indicated by arrows, \* $P < 0.05$ ,  $n = 6$ . (D)

7 Comparison of heart weight/body weight ratios between AAV9-circSamd4 and

8 AAV9-NC group after MI. \* $P < 0.05$ ,  $n = 6$ .

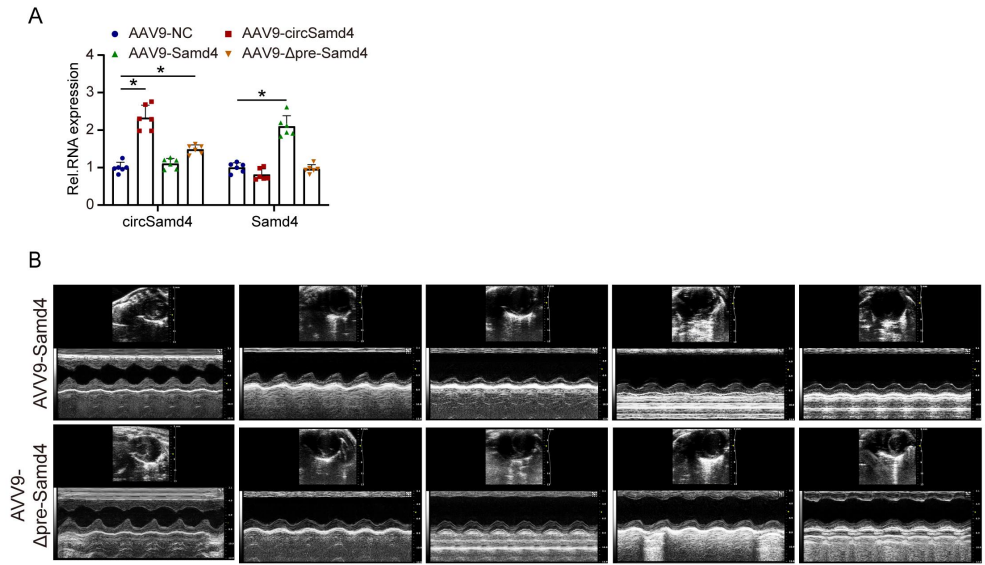

1

2 **Figure S13. The effect of Samd4 mRNA or Samd4 pre-mRNA overexpression on**  
 3 **cardiac function improvement after MI. (A) Detection of circSamd4 and Samd4**  
 4 **mRNA expression level in myocardium tissue after different AAV9 injection; \* $P < 0.05$ ,**  
 5  **$n = 6$ .  $\Delta$ pre-Samd4: Samd4 pre-mRNA fragment containing exon3 and its flanking**  
 6 **sequences (2.5kb). (B) Evaluation of the left ventricular ejection fraction (LVEF), left**  
 7 **ventricular end-systolic dimension (LVESD), left ventricular end-diastolic dimension**  
 8 **(LVEDD) and fractional shortening (FS) post-MI after Samd4 mRNA or Samd4**  
 9 **pre-mRNA fragment overexpression. The echocardiography analysis was performed**  
 10 **on Days 1, 7, 14 and 28 after surgery. The bar graph was present in Figure 5A.**

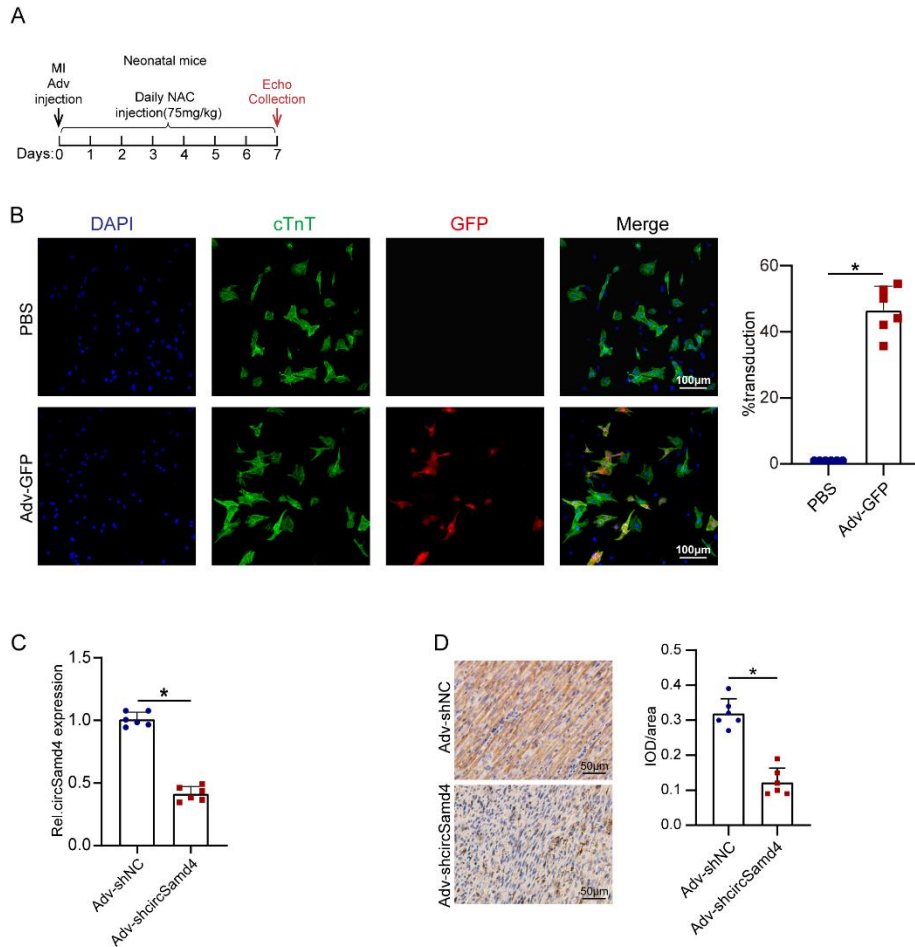

1

2 **Figure S14. Evaluation of transduction efficiency for Adv-shcircSamd4 in**

3 **neonatal mouse heart.** (A) Schematic of the MI experiments in neonatal mice. NAC,

4 N-Acetyl-L-cysteine; Echo, echocardiography. (B) Representative images and

5 quantification of GFP+ CMs isolated from neonatal mouse hearts on 7 days after

6 injection of Adv-GFP or PBS. \* $P < 0.05$ ,  $n = 6$ . (C-D) The injection of

7 Adv-shcircSamd4 reduced circSamd4 expression in neonatal mouse hearts, compared

8 to Adv-shNC; \* $P < 0.05$ ,  $n = 6$ ; (C): PCR assays, (D): ISH assays.

9

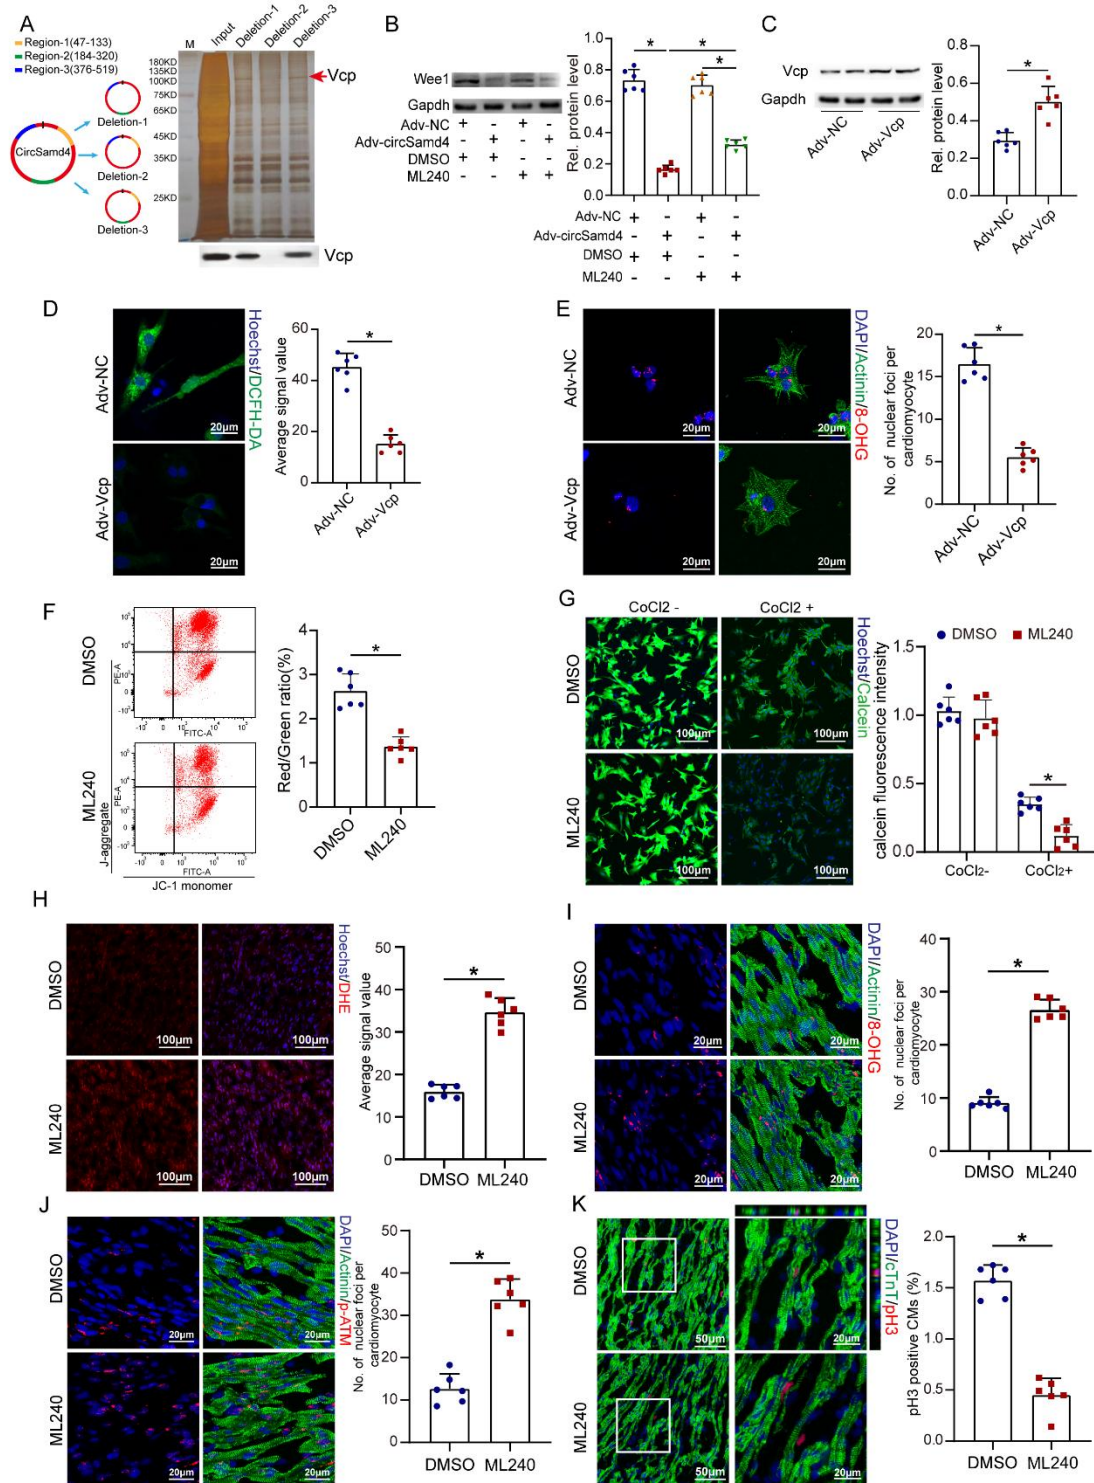

1

2 **Figure S15. The effect of Vcp overexpression and ML240 treatment on oxidative**  
 3 **injury for CMs.** (A) The CMs were transfected with circSamd4 mutants. The  
 4 schematics showed the structure of circSamd4 mutants. The CM lysates were  
 5 subjected to RNA pull-down and western blot assays. (B) Changes in the expression

1 level of the Wee1 protein after circSamd4 overexpression and/or 5μM ML-240  
 2 treatment; \**P*<0.05, n=6. (C) Vcp overexpression increased Vcp protein level in P1  
 3 CMs; \**P*<0.05, n=6. (D) Vcp overexpression reduced intracellular ROS level in CMs.  
 4 P1 CMs were transduced with Adv for 24 h, and then incubated with H<sub>2</sub>O<sub>2</sub> (20 μM)  
 5 for 8 hours. \**P*<0.05, n=6. (E) Vcp overexpression reduced oxidative DNA damage in  
 6 CMs. P1 CMs were transduced with Adv for 24 h, and then incubated with H<sub>2</sub>O<sub>2</sub> (20  
 7 μM) for 8 hours. \**P*<0.05, n=6. (F) Detection of the MMP of P1 CMs after ML-240  
 8 treatment using flow cytometry assay. \**P*<0.05, n=6. (G) Detection of the MMP  
 9 opening status of P1 CM after ML-240 treatment by Calcein-AM/CoCl<sub>2</sub> method.  
 10 \**P*<0.05, n=6. (H) ML240 treatment increased intracellular ROS level in neonatal  
 11 mouse hearts; \**P*<0.05, n=6. (I) ML240 treatment induced oxidative DNA damage in  
 12 neonatal mouse hearts. Neonatal mice were injected with ML240 (1.2mg/kg)  
 13 subcutaneously every 2 day from day 0-day 7. \**P*<0.05, n=6. (J) ML240 treatment  
 14 promoted DDR in neonatal mouse hearts; \**P*<0.05, n=6. (K) Detection of pH3<sup>+</sup> CMs  
 15 in neonatal mice treated with ML240 or DMSO; \**P*<0.05, n=6.

16

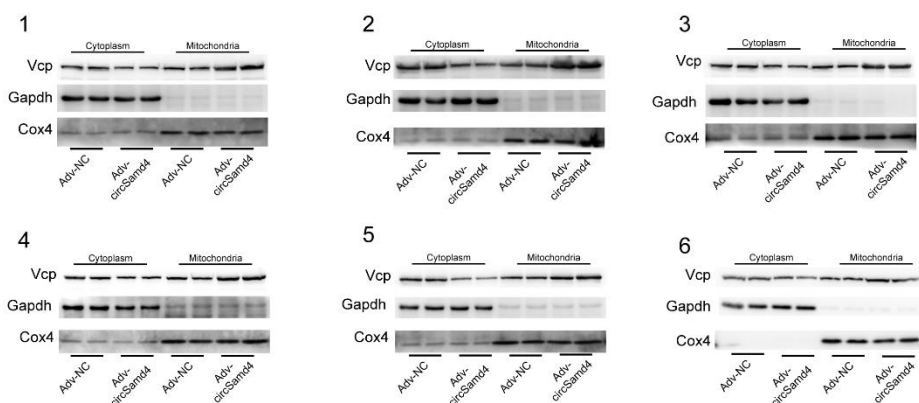

17

18 **Figure S16.** The images used for statistical analysis in the bar graph of Figure 7F.

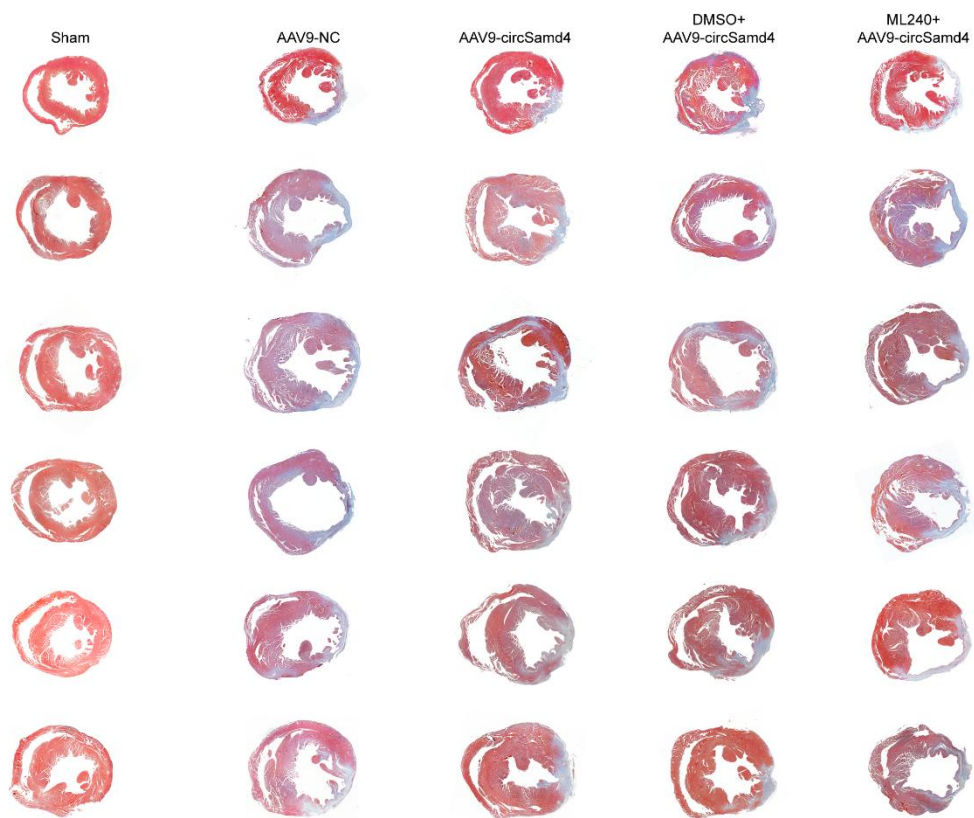

1

2 **Figure S17.** The images used for statistical analysis in the bar graph of Figure 7P.

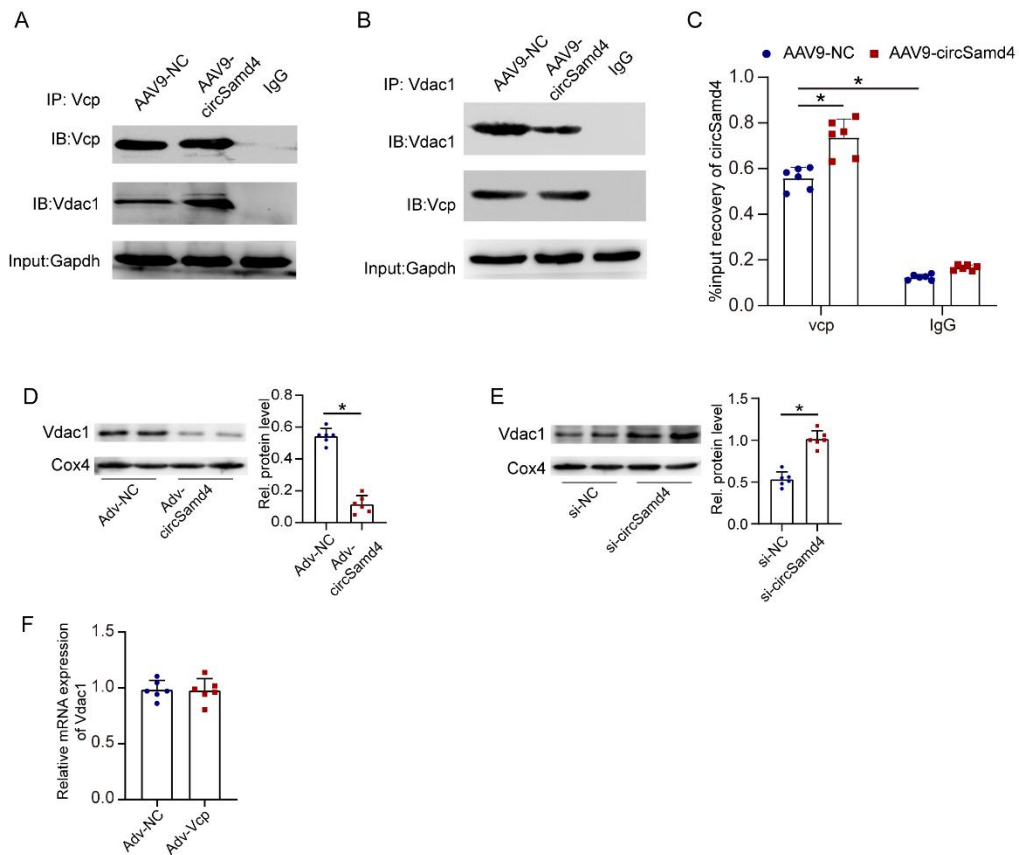

1

2 **Figure S18. Identification of ternary interaction of circSamd4/Vcp/Vdac1 on**

3 **peri-infarcted zone.** (A) Co-IP assay in border zone of infarcted hearts using

4 antibody to Vcp. (B) Co-IP assay in border zone of infarcted hearts using antibody to

5 Vdac1. (C) RIP assay in border zone of infarcted hearts using antibody to Vcp.

6 \* $P < 0.05$ ,  $n = 6$ . (D) Changes in the expression level of the outer mitochondrial

7 membrane protein Vdac1 after circSamd4 overexpression and 20  $\mu\text{M}$   $\text{H}_2\text{O}_2$  treatment;

8 \* $P < 0.05$ ,  $n = 6$ . Mitochondria were extracted from P1 CMs, and western blotting was

9 then performed to detect the Vdac1. (E) Changes in the expression level of the Vdac1

10 protein after circSamd4 interference; \* $P < 0.05$ ,  $n = 6$ . Mitochondria were extracted

11 from P1 CMs, and western blotting was then performed to detect Vdac1. (F)

12 qRT-PCR assays assessing the expression level of the Vdac1 mRNA in P1 CMs

1 transduced with Adv-Vcp or Adv-NC. \* $P < 0.05$ ,  $n = 6$ .

2

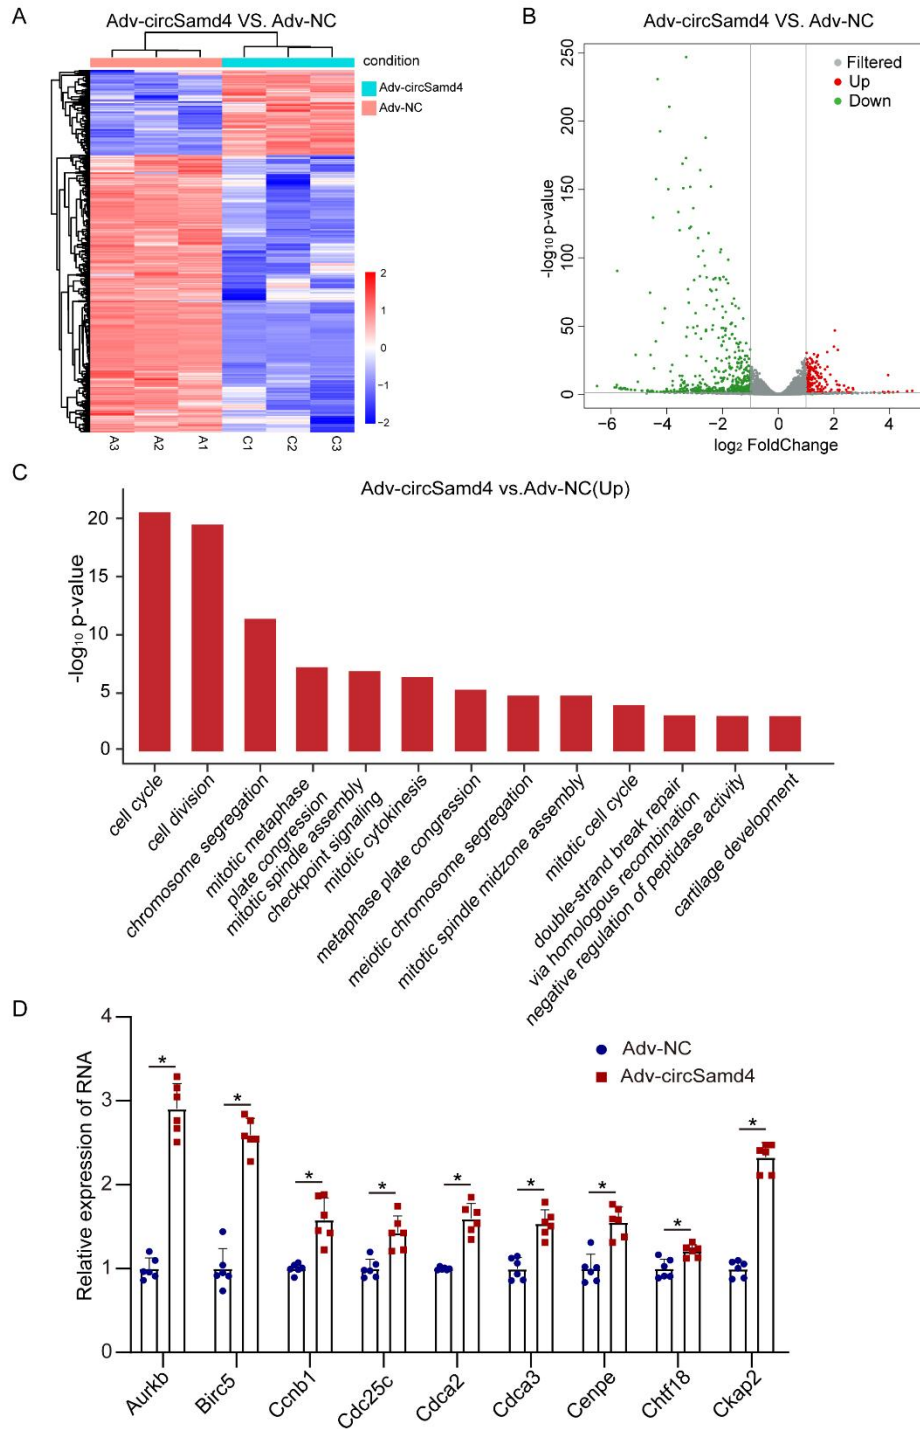

3

4 **Figure S19. Transcriptional profile of CMs after circSamd4 overexpression. (A)**

5 Heatmap highlighted the differentially expressed genes between Adv-circSamd4



1 transduced CMs and Adv-NC transduced CMs. (B) The volcano plot showed the  
2 expression profiling between Adv-circSamd4 transduced CMs and Adv-NC  
3 transduced CMs. (C) List of selected significantly enriched GO biological terms for  
4 the differentially expressed genes between Adv-circSamd4 transduced CMs and  
5 Adv-NC transduced CMs. (D) qRT-PCR assays validated the expression level of  
6 several differentially expressed genes involved in cell-cycle progression. \* $P < 0.05$ ,  
7  $n = 6$ .

8

9

10

11

12

13

14

15

16

17

18

19

20

21

22

**Table S1.** The primers used for PCR in this study.

| Primers/RNA interference name |   | Sequence (5'-3')         |
|-------------------------------|---|--------------------------|
| circSamd4                     | + | TCTACTCTTCCTCGTCTGT      |
|                               | - | CTCCTCAATGTGCTGGTT       |
| Linear-Samd4 mRNA             | + | CGCTACTGTCTGTCATCGTCTC   |
|                               | - | TCTGCTCGCACTCGTTCC       |
| pre-Samd4                     | + | CTAAGAACGCCTGGAATCA      |
|                               | - | CCTGCTCTCCTCAATGTG       |
| Samd4 Site-1                  | + | TCAATCATCGTTCAAACACCT    |
|                               | - | CAGCAAGACTTCAAAGATGAACTA |
| Samd4 Site-2                  | + | TTACGTTATTGGTGTATCTTTGGT |
|                               | - | CATTCCTGGCAGAAGTACTAC    |
| circHipk3                     | + | GGATCGGCCAGTCATGTATC     |
|                               | - | ACCGCTTGGCTCTACTTTGA     |
| circStrn3                     | + | GCTGCTGACTTAACTGATG      |
|                               | - | GTATCTGTGTATCCTACTTCCT   |
| circRyr2                      | + | CACCGCCTGTACTTCTTG       |
|                               | - | GGATACCACATAACCACTGAT    |
| Nrf2                          | + | GTGCTCCTATGCGTGAAT       |
|                               | - | TCTTACCTCTCCTGCGTATA     |
| Vcp                           | + | CTTCAGGAGTTGGTTCAGTA     |
|                               | - | AGGTCTTAGGATAGCAGGAT     |
| Vdac1                         | + | CTCTGGTGCTTGGCTATG       |
|                               | - | CCTGATACTTGGCTGCTATT     |
| Gapdh                         | + | TGACCTCAACTACATGGTCTACA  |
|                               | - | CTTCCCATTCTCGGCCTTG      |
| mt-Co2                        | + | GTCTCTATATCATCTCGCTAA    |
|                               | - | GCATAGGTCTTCATAGTCAGT    |
| mouse mtDNA                   | + | CCCATTCCACTTCTGATTACC    |
|                               | - | ATGATAGTAGAGTTGAGTAGCG   |
| mouse nucDNA                  | + | GTACCCACCTGTGCTCC        |
|                               | - | GTCCACGAGACCAATGACTG     |
| Aurkb                         | + | CTACGACCAGCAGAGGAT       |
|                               | - | ACCATCAGTTCATAGCAGAG     |
| Birc5                         | + | CATAAGGAGCACAGCCATA      |
|                               | - | GGACAGAACAAGCCAGAG       |
| Ccnb1                         | + | CAGCACTACCTATCCTACAG     |
|                               | - | CTCAGAAGCAACAACATTCA     |
| Cdc25c                        | + | TCCTCTGACTTCTCCTCTG      |
|                               | - | GACTCTTCCTCCTCCATCT      |
| Cdca2                         | + | TGTGCTTCGTTCTGTGTT       |

|          |   |                        |
|----------|---|------------------------|
|          | - | GGTTCTCCTCCTTGTCATC    |
| Cdca3    | + | CCTGTGAGACCTGGATAGA    |
|          | - | GAGGCTTAGGCTTGAGTAG    |
| Cenpe    | + | CATTGCTTGGTGGTGGTA     |
|          | - | GTTGCTGCTGTGTCTCTT     |
| Chtf18   | + | TGGAAGACTACGAGGAAGA    |
|          | - | CAGGACAGGATTGCGATT     |
| Ckap2    | + | ACTTGTGCGACCTCCTAT     |
|          | - | GCTATAACTTCAGATGCTATGG |
| Sod1     | + | GCTTCTCGTCTTGCTCTC     |
|          | - | GACAACACAACCTGGTTCAC   |
| Sod2     | + | GTGTGCTGTATGAATGTGTT   |
|          | - | AGATGGTGAGACGAATGTG    |
| Gpx1     | + | GAGAAGTGCGAAGTGAATG    |
|          | - | CCTTAGGAGTTGCCAGAC     |
| Ucp3     |   | CTGCTCTTCTGCCTTCTC     |
|          |   | CATTCTGTCCTTCCACCAT    |
| Catalase | + | TCAGGTGCGGACATTCTA     |
|          | - | ATTGCGTTCTTAGGCTTCT    |
| Ant1     | + | AACCAGACCGTAAGGAATAC   |
|          | - | TTCAGCATCAGTTCTTCAGT   |
| U6       | + | GCGCGTCGTGAAGCGTTC     |
|          | - | GTGCAG GGTCCGAGGT      |

1

2

3

4

5

6

7

8

9

10

1

**Table S2.** The RNA interference used in this study.

| siRNA name                 | Sequence (5'-3')    |
|----------------------------|---------------------|
| ShcircSamd4/si-circSamd4-1 | GCAAGCACGAGAATCATTA |
| ShcircSamd4/si-circSamd4-2 | CAAGCACGAGGAATCATTA |
| Si-Nrf2                    | GCAGGAGAGGTAAGAATAA |

2

3 **Table S3.** The results of mass spectrometry analysis after RNA pulldown related to

4 Fig. 7A.

5

6 **Table S4.** The differentially expressed genes between Adv-circSamd4 and Adv-NC

7 group.

8

9 **Supplemental Video. 1-4** Time-lapse imaging of CMs after interventions

10 corresponding to Fig. 3E. Video 1: PBS group; Video 2: H<sub>2</sub>O<sub>2</sub> group; Video 3:

11 H<sub>2</sub>O<sub>2</sub>+Adv-NC group; Video 4: H<sub>2</sub>O<sub>2</sub>+Adv-circSamd4 group. Time-lapse imaging

12 started 12hr post-transduction (1/3 hr/Frame).

13
